# Supplementary material
Source: ML conference proceedings conference paper supplement (https://openaccess.thecvf.com/content/CVPR2023/html/Wang_Deep_Arbitrary-Scale_Image_CVPR_2023_paper.html)
Supplement: Supplementary file 1 [file Wang_Deep_Arbitrary-Scale_Image_CVPR_2023_supplemental.pdf]

# Supplemental Material: Deep Arbitrary-Scale Image Super-Resolution via Scale-Equivariance Pursuit

Xiaohang Wang<sup>1\*</sup> Xuanhong Chen<sup>1\*</sup> Bingbing Ni<sup>1†</sup> Hang Wang<sup>2</sup> Zhengyan Tong<sup>1</sup> Yutian Liu<sup>1</sup>  
<sup>1</sup>Shanghai Jiao Tong University, Shanghai 200240, China      <sup>2</sup>Huawei  
{xygz2014010003, chen19910528, nibingbing}@sjtu.edu.cn

## 1. Overview

In this supplemental material, we first introduce our AFE operator in more detail and compare it with the previous SOTA method to draw a difference. We then give a more comprehensive introduction to CKA, the metric we use to measure feature similarity in the main text. We also perform additional experiments to determine the influence of parameters such as training iterations and the number of AFE Groups on model performance. Finally, we show more qualitative and quantitative comparison results to demonstrate the effectiveness of our method.

## 2. Adaptive Feature Extractor

In this section, we introduce the design of our Adaptive Feature Extractor (AFE) module in more detail and explain the configurations in our experiments. Meanwhile, we also compare with the previous SOTA scale injection method, i.e., Scale-Aware Convolution in ArbSR [13], to prove the excellent performance of our AFE module.

### 2.1. Algorithm of Adaptive Feature Extractor

The core of AFE is the injection of additional scale information, which assists the backbone extract features adaptively. A naive idea is to encode the magnification into a discrete space (e.g., one-hot encoding) and inject it into the model’s backbone network. However, as in the problem setting of arbitrary-scale image super-resolution (ASISR), the scale can be any valid real-number (i.e., continuous and infinite). This means that these traditional discrete encoding algorithms cannot be applied to the ASISR problem. To solve this issue, we try to map the real-valued scale to a continuous high-dimensional space, and the pseudo-codes are described in Algorithm 1. Note in Algorithm 1,  $B$  is the input batch size,  $C$  is the number of channels,  $k$  denote the kernel size of convolution,  $dim$  denotes the encoding dims of sine and cosine,  $h$  and  $w$  denote the height and width of

input LR images, respectively. In our experiments, we set  $C = 180$ ,  $k = 3$ , and  $dim = 40$ .

---

### Algorithm 1 Forward step of Adaptive Feature Extractor.

---

#### Input:

Feature maps from previous stages  $X_{in} \in \mathbb{R}^{B \times C \times h \times w}$ ; upsampling scale,  $r \in \mathbb{R}$ ; linear mapping layer,  $\mathcal{F}$ ; convolutional kernel basis,  $\mathcal{W} \in \mathbb{R}^{C \times C \times k \times k}$ ; convolution bias  $\mathcal{B} \in \mathbb{R}^C$ .

#### Output:

Feature maps extracted according to scales,  $X_{out}$ .

- 1: Expand the scale  $r$  to a higher dimension by sine-cosine encoding and concatenate the results to obtain  $r' \in \mathbb{R}^{1 \times (2dim+1)}$ ;
  - 2: Obtain the scale vector  $v \leftarrow \mathcal{F}(r') \in \mathbb{R}^{1 \times C}$ ;
  - 3: Modulate the scale vector onto the convolution kernel basis to obtain the final weights  $\mathcal{W}' \leftarrow v \otimes \mathcal{W}$ ;
  - 4: Convolve with feature maps from previous stage.  $X'_{in} \leftarrow \mathcal{W}' * X_{in}$ ;
  - 5: Add the bias to get output  $X_{out} \leftarrow X'_{in} + \mathcal{B}$ .
  - 6: **return**  $X_{out} \in \mathbb{R}^{B \times C \times h \times w}$ ;
- 

### 2.2. Comparison with Scale-Aware Convolution

To further illustrate the effectiveness of our AFE operator, we compare it with the previous SOTA scale injection method, Scale-Aware Convolution [13]. From the perspective of neural networks, both AFE and Scale-Aware Convolution can be regarded as dynamic convolutions. They dynamically adjust the weight of the convolution kernels by modulating a scale vector to inject the scale information into the feature extraction process explicitly, achieving the purpose of adaptive feature extraction. However, as shown in Figure 1, the implementation of these two methods has three significant differences.

First, the overall structure is different. Given a feature map  $X_{in}$ , Scale-Aware Convolution first feeds it into an hourglass module with four convolutions and a sigmoid layer to generate a guidance map  $M$  with values ranging

---

\*Equal Contribution.

†Corresponding author: Bingbing Ni.

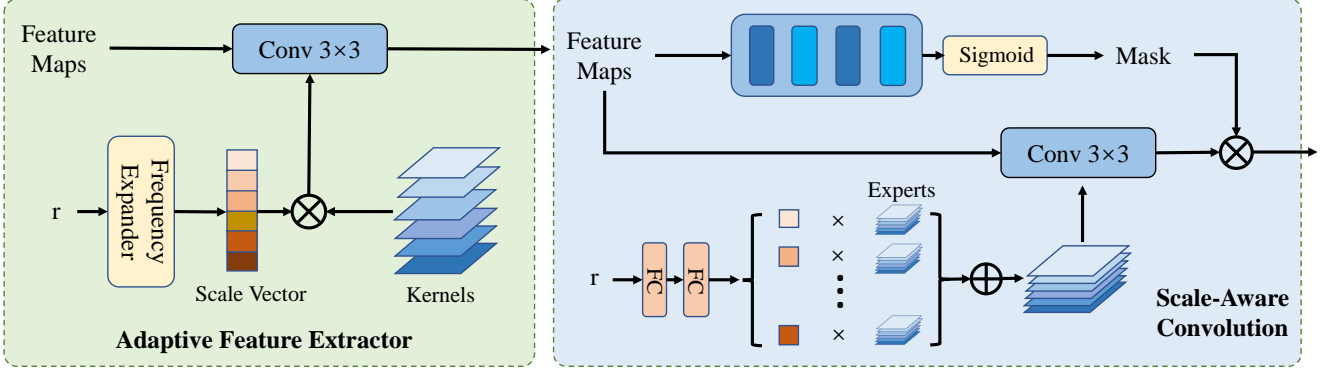

Figure 1. Comparison of AFE and Scale-Aware Convolution [13] in structure. AFE is much simpler and more flexible than the previous method.

from 0 to 1. This mask is then used to filter features extracted from the scale-aware branch, probably because the scale-aware branch will introduce some unnecessary information that needs to be filtered out. While in our design, the AFE operator abandons the branch of filtering feature maps through guidance maps and instead focuses on affecting the convolution kernel itself to enhance the equivariance of the feature extraction process. Second, the scale information affects convolution differently. In Scale-Aware Convolution, the authors pre-define a series of experts, which are actually several sets of weights, as the basic kernels. These experts will be linearly combined according to certain weights as the final convolution kernel, and the scale is used to predict their weights. Although this method can also achieve dynamic convolution, the weight of scale prediction acts on the entire expert (i.e., the kernel of one channel cannot be changed alone), which seriously limits the dynamic ability of the last convolution kernel. While in AFE, we only use one set of kernel basis, and the weights predicted by scale will be applied to each channel of the kernel. This dramatically increases the flexibility of weight combinations. Third, the complexity of AFE is significantly lower. Since Scale-Aware Convolution needs to define multiple experts, its parameter quantity is much higher than our method. When the number of experts is 4, even without considering the branch of predicting mask, the parameter amount of AFE is only about 25% of Scale-Aware Convolution.

### 3. Metric of Feature Similarity

As described in the main text, we use Centered Kernel Alignment (CKA) [6, 11] as a feature similarity measure. In this section, we introduce CKA in more detail.

**Centered Kernel Alignment.** Centered Kernel Alignment (CKA) is a representation similarity metric widely used to understand the representations learned by neural networks. In this paper, we use the Gram matrices to calcu-

late CKA. Specifically, take  $\mathbf{X} \in \mathbb{R}^{m \times p_1}$  and  $\mathbf{Y} \in \mathbb{R}^{m \times p_2}$  as the two feature maps to be compared, we first compute the Gram matrices  $\mathbf{K}$  and  $\mathbf{T}$  as follows:

$$\mathbf{K} = \mathbf{X}\mathbf{X}^T, \mathbf{L} = \mathbf{Y}\mathbf{Y}^T. \quad (1)$$

Then we compute their normalized similarity in terms of the Hilbert-Schmidt Independence Criterion (HSIC) [3] as

$$\mathbf{K}' = \mathbf{H}\mathbf{K}\mathbf{H}, \mathbf{L}' = \mathbf{H}\mathbf{L}\mathbf{H}, \quad (2)$$

$$HSIC(\mathbf{K}, \mathbf{L}) = \text{vec}(\mathbf{K}') \cdot \text{vec}(\mathbf{L}') / (m-1)^2, \quad (3)$$

where  $H$  is a centering matrix, and  $\text{vec}(\cdot)$  denotes a vectorized function. At last, CKA can be calculated as

$$CKA(\mathbf{K}, \mathbf{L}) = \frac{HSIC(\mathbf{K}, \mathbf{L})}{\sqrt{HSIC(\mathbf{K}, \mathbf{K})HSIC_0(\mathbf{L}, \mathbf{L})}}, \quad (4)$$

which is a real number in  $[0, 1]$ , and the higher its value, the greater the similarity.

However, the above formula is not scalable against deep architectures and large datasets. Therefore, we follow the work of [11], in which the authors propose a minibatch version that can be constructed by an unbiased estimator of the HSIC as:

$$CKA_{minibatch}(\mathbf{K}, \mathbf{L}) = \frac{\frac{1}{k} \sum_k^{i=1} HSIC(\mathbf{X}_i \mathbf{X}_i^T, \mathbf{Y}_i \mathbf{Y}_i^T)}{\sqrt{\sum_k^{i=1} HSIC(\mathbf{X}_i \mathbf{X}_i^T, \mathbf{X}_i \mathbf{X}_i^T) \sum_k^{i=1} HSIC(\mathbf{Y}_i \mathbf{Y}_i^T, \mathbf{Y}_i \mathbf{Y}_i^T)}}. \quad (5)$$

**Experiment Details.** In our experiments, we choose batchsize=4 and compute the CKA similarity between models for different scales on the Urban100 dataset. For ArbSR [13], we compare the feature maps from each ResBlock; for HAT [1] and our EQNet, we compare the feature generated by each attention layer.

Table 1. Quantitative comparison (PSNR) for different number of AFE Groups and WSA Blocks per group. The best and second-best results are marked in red and blue colors, respectively. We choose Model IV as the final model to report in the main text.

|     | num of Groups | WSAs per Group | paras | Urban100 [5] |            |            |
|-----|---------------|----------------|-------|--------------|------------|------------|
|     |               |                |       | $\times 2$   | $\times 4$ | $\times 6$ |
| I   | 4             | 4              | 8.5M  | 33.35        | 26.92      | 24.24      |
| II  | 4             | 5              | 9.6M  | 33.41        | 27.17      | 24.50      |
| III | 5             | 5              | 11.6M | 33.52        | 27.22      | 24.57      |
| IV  | 6             | 5              | 13.6M | 33.62        | 27.30      | 24.66      |
| V   | 6             | 6              | 15.2M | 33.64        | 27.31      | 24.63      |

Table 2. Quantitative comparison (PSNR) for different training stages of our EQNet. The best and second-best results are marked in red and blue colors, respectively. Note that we enable the pre-training strategy for this comparison.

|     | Iterations |      | Urban100 [5] |            |            |
|-----|------------|------|--------------|------------|------------|
|     | ImageNet   | DF2K | $\times 2$   | $\times 4$ | $\times 6$ |
| I   | 200k       | 0    | 33.00        | 26.92      | 24.36      |
| II  | 400k       | 0    | 33.29        | 27.28      | 24.67      |
| III | 600k       | 0    | 33.41        | 27.47      | 24.82      |
| IV  | 800k       | 0    | 33.45        | 27.52      | 24.89      |
| V   | 800k       | 200k | 33.83        | 27.54      | 24.83      |

## 4. Additional Experiments

In this section, we conduct additional experiments to illustrate the role of different hyperparameters in the model.

### 4.1. The Number of Groups and Blocks

Generally speaking, a larger model usually has a larger capacity and more vital learning ability. However, such a model also commonly suffers from problems such as being difficult to train and prone to overfitting due to a large number of parameters. Therefore, it is important to make a trade-off on model size. To this end, in this subsection, we change the number of AFE Groups and the number of window-based self-attention (WSA) blocks per group in our backbone and test their performance on the Urban100 dataset. The results at scales  $\times 2/4/6$  are shown in Table 1. Note that we DO NOT adopt the pre-training strategy in these experiments.

From Table 1, we observe that from Model I to Model IV, as the model size becomes larger, the performance both in training distribution and out of the distribution continues to improve. However, comparing Model IV and Model V, it can be observed that the benefit of increasing the parameters is not as evident as before. The performance is even degraded in the case of  $\times 6$ . This means that Model V is likely to be overfitting. Therefore, we choose Model IV as the final model in the main text.

## 4.2. Training Iterations

We also explore the performance of EQNet at different stages of the training process, and the results in PSNR are shown in Table 2. Note that we use the pre-training strategy for this comparison. We first train EQNet on ImageNet dataset [7] for 800k iterations, and then train on DF2K dataset [12] for the rest 200k iterations.

From Table 2, it can be observed that with the increase of training iterations, our model’s performance continues to improve. We also observe that cases out of the training distribution converge faster than those inside the distribution. This means that from the middle of the training process (about 600k iterations), EQNet already has a basic certainty of equivariance and generalization. On the other hand, at scale  $\times 2$ , there is a significant gap (0.38dB) between Model IV and Model V, while at  $\times 4$  and  $\times 6$ , the gaps are much smaller, indicating that the DF2K dataset is more beneficial for training at lower scales. As a matter of fact, arbitrary-scale image super-resolution can be viewed as a multi-task problem, which is much more complicated than normal super-resolution. Therefore, training the network for a long time is essential to fully exploit the model’s potential.

## 4.3. More Comparisons

In this subsection, we conduct more qualitative and quantitative comparisons of our EQNet with previous SOTA methods.

**Quantitative Comparison.** To further test the performance of our method, we continue to compare our EQNet model with other state-of-the-art arbitrary-scale SR methods: MetaSR [4], ArbSR [13], LIIF [2] and LTE [8]. In addition to the average Peak Signal to Noise Ratio (PSNR), we also report these models’ Structural Similarity (SSIM). The quantitative results for  $\times 2.25/2.75/3.25/3.75/4.25/4.75/5.25$  SR are shown in Table 3. Note that all comparison ASISR models are based on one single model protocol. It can be observed that our method achieves the best results under most configurations in terms of both PSNR and SSIM, especially at out-of-distribution scales  $\times 4.25/4.75/5.25$ .

**Qualitative Comparison.** We also conduct more qualitative comparisons of different methods with different scale factors. Figure 2 shows the results on Urban100 dataset [5]. It can be observed that EQNet is far superior to other methods in processing complex textures, which further illustrates our method’s ability to restore high-frequency information. Figure 3 displays the results on BSD100 dataset [9]. The results show that our method also has significant advantages in reconstructing details when processing natural images (for example, the edge contour of the window in the first row). Figure 4 shows the results on Manga109 dataset [10]. From the comparison, we observe that our model is able to

restore more clear edges for printed texts at different scales, such as the letters E, A, P, R, and so on. These comparisons further demonstrate the effectiveness of our equivariant model.

## References

- [1] Xiangyu Chen, Xintao Wang, Jiantao Zhou, and Chao Dong. Activating more pixels in image super-resolution transformer. *arXiv preprint arXiv:2205.04437*, 2022. 2
- [2] Yinbo Chen, Sifei Liu, and Xiaolong Wang. Learning continuous image representation with local implicit image function. In *Proceedings of the IEEE/CVF conference on computer vision and pattern recognition*, pages 8628–8638, 2021. 3, 5
- [3] Arthur Gretton, Kenji Fukumizu, Choon Teo, Le Song, Bernhard Schölkopf, and Alex Smola. A kernel statistical test of independence. *Advances in neural information processing systems*, 20, 2007. 2
- [4] Xuecai Hu, Haoyuan Mu, Xiangyu Zhang, Zilei Wang, Tieniu Tan, and Jian Sun. Meta-sr: A magnification-arbitrary network for super-resolution. In *Proceedings of the IEEE/CVF conference on computer vision and pattern recognition*, pages 1575–1584, 2019. 3, 5
- [5] Jia-Bin Huang, Abhishek Singh, and Narendra Ahuja. Single image super-resolution from transformed self-exemplars. In *CVPR*, pages 5197–5206, 2015. 3, 6
- [6] Simon Kornblith, Jonathon Shlens, and Quoc V Le. Do better imagenet models transfer better? In *Proceedings of the IEEE/CVF conference on computer vision and pattern recognition*, pages 2661–2671, 2019. 2
- [7] Alex Krizhevsky, Ilya Sutskever, and Geoffrey E Hinton. Imagenet classification with deep convolutional neural networks. *Advances in neural information processing systems*, 25:1097–1105, 2012. 3
- [8] Jaewon Lee and Kyong Hwan Jin. Local texture estimator for implicit representation function. In *Proceedings of the IEEE/CVF Conference on Computer Vision and Pattern Recognition*, pages 1929–1938, 2022. 3, 5
- [9] David Martin, Charless Fowlkes, Doron Tal, and Jitendra Malik. A database of human segmented natural images and its application to evaluating segmentation algorithms and measuring ecological statistics. In *ICCV*, volume 2, pages 416–423. IEEE, 2001. 3, 6
- [10] Yusuke Matsui, Kota Ito, Yuji Aramaki, Azuma Fujimoto, Toru Ogawa, Toshihiko Yamasaki, and Kiyoharu Aizawa. Sketch-based manga retrieval using manga109 dataset. *Multimedia Tools and Applications*, 76(20):21811–21838, 2017. 3, 7
- [11] Thao Nguyen, Maithra Raghu, and Simon Kornblith. Do wide and deep networks learn the same things? uncovering how neural network representations vary with width and depth. *arXiv preprint arXiv:2010.15327*, 2020. 2
- [12] Radu Timofte, Eirikur Agustsson, Luc Van Gool, Ming-Hsuan Yang, and Lei Zhang. Ntire 2017 challenge on single image super-resolution: Methods and results. In *CVPR workshops*, pages 114–125, 2017. 3
- [13] Longguang Wang, Yingqian Wang, Zaiping Lin, Jungang Yang, Wei An, and Yulan Guo. Learning a single network for scale-arbitrary super-resolution. In *Proceedings of the IEEE/CVF international conference on computer vision*, pages 4801–4810, 2021. 1, 2, 3, 5

Table 3. Quantitative comparison (in average PSNR and SSIM) for **arbitrary-scale SR** with state-of-the-art methods on benchmark datasets. The best and second-best results are marked in **red** and **blue** colors, respectively. “†” indicates that methods adopt pre-training strategy on ImageNet.

| Method       | Scale        | Set5          |               | Set14         |               | BSD100        |               | Urban100      |               | Manga109      |               |
|--------------|--------------|---------------|---------------|---------------|---------------|---------------|---------------|---------------|---------------|---------------|---------------|
|              |              | PSNR          | SSIM          |
| Bicubic      | ×2.25        | 32.99         | 0.9192        | 29.66         | 0.8494        | 28.85         | 0.8190        | 26.21         | 0.8152        | 29.81         | 0.9177        |
| MetaSR [4]   |              | 37.01         | 0.9513        | 32.80         | 0.9002        | 31.20         | 0.8753        | 31.71         | 0.9211        | 37.75         | 0.9674        |
| ArbSR [13]   |              | 37.02         | 0.9537        | 32.84         | 0.9017        | 31.24         | 0.8767        | 31.71         | 0.9196        | 37.84         | 0.9710        |
| LIIF [2]     |              | 37.05         | 0.9528        | 32.84         | 0.9023        | 31.27         | 0.8761        | 31.54         | 0.9178        | 37.72         | 0.9709        |
| LTE [8]      |              | <b>37.20</b>  | <b>0.9539</b> | 33.12         | 0.9235        | <b>31.42</b>  | <b>0.8796</b> | 32.08         | 0.9211        | 38.11         | 0.9707        |
| <b>Ours</b>  |              | 27.18         | 0.9530        | <b>33.25</b>  | <b>0.9253</b> | 31.37         | 0.8779        | <b>32.20</b>  | <b>0.9245</b> | <b>28.14</b>  | <b>0.9714</b> |
| <b>Ours†</b> | <b>37.22</b> | <b>0.9541</b> | <b>33.32</b>  | <b>0.9286</b> | <b>31.43</b>  | <b>0.8792</b> | <b>32.57</b>  | <b>0.9286</b> | <b>38.19</b>  | <b>0.9726</b> |               |
| Bicubic      | ×2.75        | 31.06         | 0.8864        | 28.29         | 0.8002        | 27.71         | 0.7728        | 24.98         | 0.7610        | 27.64         | 0.8774        |
| MetaSR [4]   |              | 35.36         | 0.9380        | 31.19         | 0.8627        | 29.86         | 0.8345        | 29.73         | 0.8849        | 35.46         | 0.9543        |
| ArbSR [13]   |              | 35.39         | 0.9374        | 31.23         | 0.8638        | 29.91         | 0.8385        | 29.71         | 0.8856        | 35.51         | 0.9567        |
| LIIF [2]     |              | 35.38         | 0.9372        | 31.11         | 0.8638        | 29.83         | 0.8306        | 29.57         | 0.8829        | 35.27         | 0.9562        |
| LTE [8]      |              | 35.51         | <b>0.9385</b> | 31.44         | <b>0.8690</b> | 29.89         | 0.8331        | 29.84         | 0.8895        | <b>35.85</b>  | <b>0.9586</b> |
| <b>Ours</b>  |              | <b>35.52</b>  | 0.9381        | <b>31.47</b>  | 0.8682        | <b>29.91</b>  | <b>0.8335</b> | <b>30.12</b>  | <b>0.8916</b> | <b>35.77</b>  | 0.9570        |
| <b>Ours†</b> | <b>35.55</b> | <b>0.9389</b> | <b>31.60</b>  | <b>0.8689</b> | <b>29.96</b>  | <b>0.8343</b> | <b>30.58</b>  | <b>0.8977</b> | <b>35.86</b>  | <b>0.9593</b> |               |
| Bicubic      | ×3.25        | 29.21         | 0.8528        | 27.17         | 0.7569        | 26.97         | 0.7339        | 24.09         | 0.7142        | 26.40         | 0.8375        |
| MetaSR [4]   |              | 33.98         | 0.9177        | 29.73         | 0.8283        | 28.99         | 0.8042        | 28.19         | 0.8505        | 33.49         | 0.9398        |
| ArbSR [13]   |              | 34.03         | 0.9226        | 29.87         | 0.8290        | 29.00         | 0.8038        | 28.22         | 0.8518        | 33.55         | 0.9410        |
| LIIF [2]     |              | 34.12         | 0.9221        | 30.00         | 0.8302        | 28.83         | 0.7914        | 28.19         | 0.8500        | 33.35         | 0.9406        |
| LTE [8]      |              | <b>34.42</b>  | <b>0.9239</b> | 30.26         | 0.8324        | 28.87         | 0.7946        | 28.73         | 0.8598        | 33.76         | 0.9423        |
| <b>Ours</b>  |              | 34.37         | 0.9235        | <b>30.30</b>  | <b>0.8339</b> | <b>28.91</b>  | <b>0.7952</b> | <b>28.85</b>  | <b>0.8628</b> | <b>33.89</b>  | <b>0.9425</b> |
| <b>Ours†</b> | <b>34.44</b> | <b>0.9247</b> | <b>30.43</b>  | <b>0.8365</b> | <b>28.97</b>  | <b>0.7960</b> | <b>29.12</b>  | <b>0.8683</b> | <b>34.16</b>  | <b>0.9457</b> |               |
| Bicubic      | ×3.75        | 28.98         | 0.8331        | 26.37         | 0.7224        | 26.20         | 0.6885        | 23.30         | 0.6756        | 25.41         | 0.8043        |
| MetaSR [4]   |              | 33.15         | 0.9139        | 29.05         | 0.8025        | 27.98         | 0.7583        | 27.07         | 0.8180        | 31.90         | 0.9222        |
| ArbSR [13]   |              | 33.12         | 0.9126        | 29.01         | 0.8011        | 28.01         | 0.7605        | 27.09         | 0.8192        | 31.93         | 0.9247        |
| LIIF [2]     |              | 33.04         | 0.9073        | 29.14         | 0.8004        | 28.07         | 0.7575        | 27.13         | 0.8190        | 31.83         | 0.9251        |
| LTE [8]      |              | 33.10         | 0.9083        | 29.22         | 0.8039        | 28.10         | 0.7606        | 27.65         | 0.8324        | 32.41         | <b>0.9303</b> |
| <b>Ours</b>  |              | <b>33.13</b>  | <b>0.9092</b> | <b>29.27</b>  | <b>0.8045</b> | <b>28.16</b>  | <b>0.7613</b> | <b>27.69</b>  | <b>0.8337</b> | <b>33.51</b>  | 0.9298        |
| <b>Ours†</b> | <b>33.30</b> | <b>0.9110</b> | <b>29.52</b>  | <b>0.8071</b> | <b>28.21</b>  | <b>0.7627</b> | <b>28.01</b>  | <b>0.8402</b> | <b>32.70</b>  | <b>0.9323</b> |               |
| Bicubic      | ×*4.25       | 28.08         | 0.7983        | 24.17         | 0.6945        | 25.79         | 0.6697        | 22.95         | 0.6442        | 24.49         | 0.7698        |
| MetaSR [4]   |              | 31.75         | 0.8890        | 28.47         | 0.7765        | 27.53         | 0.7427        | 26.13         | 0.7872        | 30.29         | 0.9035        |
| ArbSR [13]   |              | 31.76         | 0.8887        | 28.46         | 0.7759        | 27.52         | 0.7420        | 26.10         | 0.7864        | 30.31         | 0.9044        |
| LIIF [2]     |              | 32.05         | 0.8917        | 28.50         | 0.7748        | 27.46         | 0.7286        | 26.25         | 0.7896        | 30.52         | 0.9094        |
| LTE [8]      |              | <b>32.43</b>  | <b>0.8952</b> | 28.55         | 0.7774        | <b>27.46</b>  | 0.7314        | 26.67         | 0.8044        | 30.66         | 0.9112        |
| <b>Ours</b>  |              | 32.30         | 0.8932        | <b>28.72</b>  | <b>0.7795</b> | 27.43         | <b>0.7317</b> | <b>26.79</b>  | <b>0.8068</b> | <b>30.87</b>  | <b>0.9135</b> |
| <b>Ours†</b> | <b>32.42</b> | <b>0.8966</b> | <b>28.78</b>  | <b>0.7807</b> | <b>27.61</b>  | <b>0.7341</b> | <b>27.11</b>  | <b>0.8134</b> | <b>31.41</b>  | <b>0.9183</b> |               |
| Bicubic      | ×*4.75       | 27.37         | 0.7717        | 23.87         | 0.6627        | 24.25         | 0.6401        | 22.47         | 0.6133        | 23.85         | 0.7435        |
| MetaSR [4]   |              | 30.62         | 0.8716        | 27.71         | 0.7439        | 26.92         | 0.7091        | 25.36         | 0.7549        | 29.06         | 0.8861        |
| ArbSR [13]   |              | 30.59         | 0.8704        | 27.67         | 0.7436        | 26.89         | 0.7085        | 25.21         | 0.7512        | 28.88         | 0.8820        |
| LIIF [2]     |              | 31.15         | 0.8762        | 27.88         | 0.7522        | 26.96         | 0.7044        | 25.55         | 0.7626        | 29.47         | 0.8938        |
| LTE [8]      |              | 31.40         | <b>0.8802</b> | 27.87         | 0.7511        | 26.98         | 0.7078        | 25.80         | 0.7761        | 29.79         | 0.8977        |
| <b>Ours</b>  |              | <b>31.46</b>  | 0.8794        | <b>28.01</b>  | <b>0.7553</b> | <b>27.03</b>  | <b>0.7085</b> | <b>25.92</b>  | <b>0.7794</b> | <b>29.95</b>  | <b>0.9003</b> |
| <b>Ours†</b> | <b>31.67</b> | <b>0.8831</b> | <b>28.12</b>  | <b>0.7580</b> | <b>27.10</b>  | <b>0.7099</b> | <b>26.36</b>  | <b>0.7879</b> | <b>30.35</b>  | <b>0.9045</b> |               |
| Bicubic      | ×*5.25       | 26.91         | 0.7579        | 23.23         | 0.6437        | 23.90         | 0.6096        | 22.09         | 0.5885        | 21.83         | 0.7201        |
| MetaSR [4]   |              | 29.95         | 0.8583        | 27.10         | 0.7285        | 26.27         | 0.6761        | 24.73         | 0.7303        | 28.19         | 0.8654        |
| ArbSR [13]   |              | 29.86         | 0.8558        | 26.89         | 0.7262        | 26.22         | 0.6742        | 24.47         | 0.7190        | 27.59         | 0.8570        |
| LIIF [2]     |              | 30.38         | 0.8611        | 27.38         | 0.7310        | 26.52         | 0.6824        | 24.95         | 0.7374        | 28.54         | 0.8779        |
| LTE [8]      |              | 30.51         | 0.8652        | 27.46         | 0.7353        | 26.56         | 0.6862        | 25.19         | 0.7514        | 28.96         | 0.8803        |
| <b>Ours</b>  |              | <b>30.56</b>  | <b>0.8660</b> | <b>27.49</b>  | <b>0.7366</b> | <b>26.57</b>  | <b>0.6866</b> | <b>25.32</b>  | <b>0.7546</b> | <b>29.14</b>  | <b>0.8845</b> |
| <b>Ours†</b> | <b>30.87</b> | <b>0.8687</b> | <b>27.63</b>  | <b>0.7379</b> | <b>26.67</b>  | <b>0.6884</b> | <b>25.70</b>  | <b>0.7634</b> | <b>29.36</b>  | <b>0.8895</b> |               |

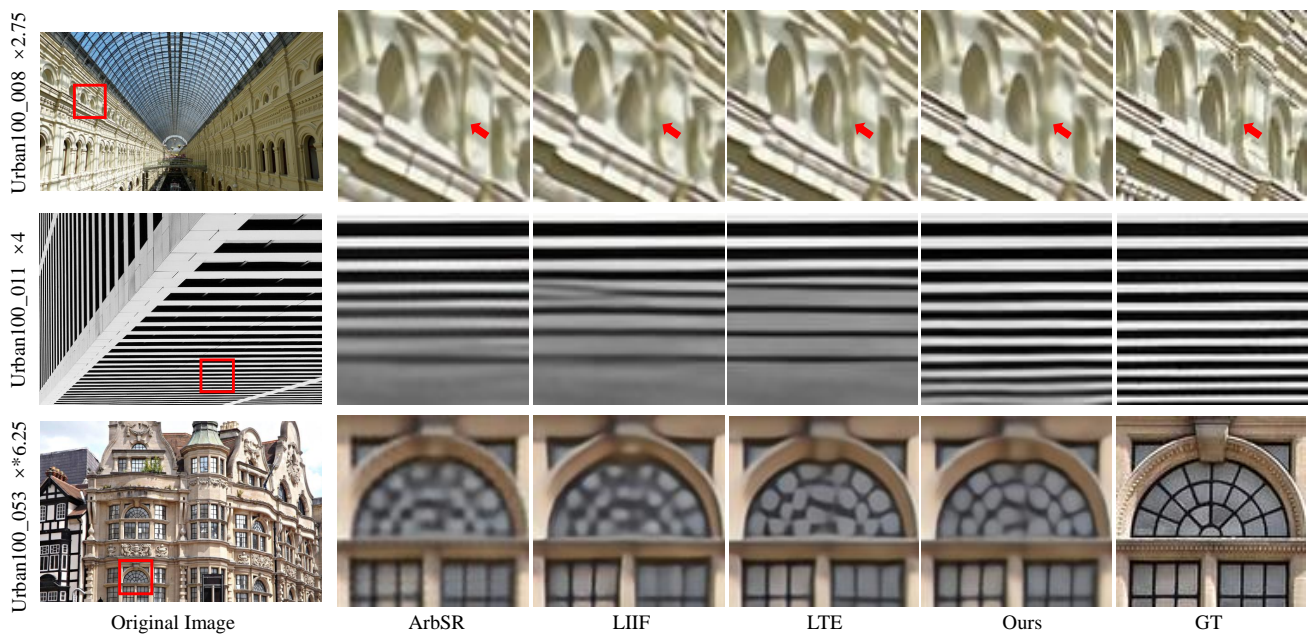

Figure 2. Visual comparison for arbitrary-scale SR models on Urban100 dataset [5]. In the first row, our method can restore a more realistic shape of the hole. In the second row, our method reconstructs dense textures accurately, while other methods produce blurred results. The third row shows that our model can keep the original contour of the object as much as possible when the scale is large. This further illustrates that our method’s ability to restore high-frequency information.

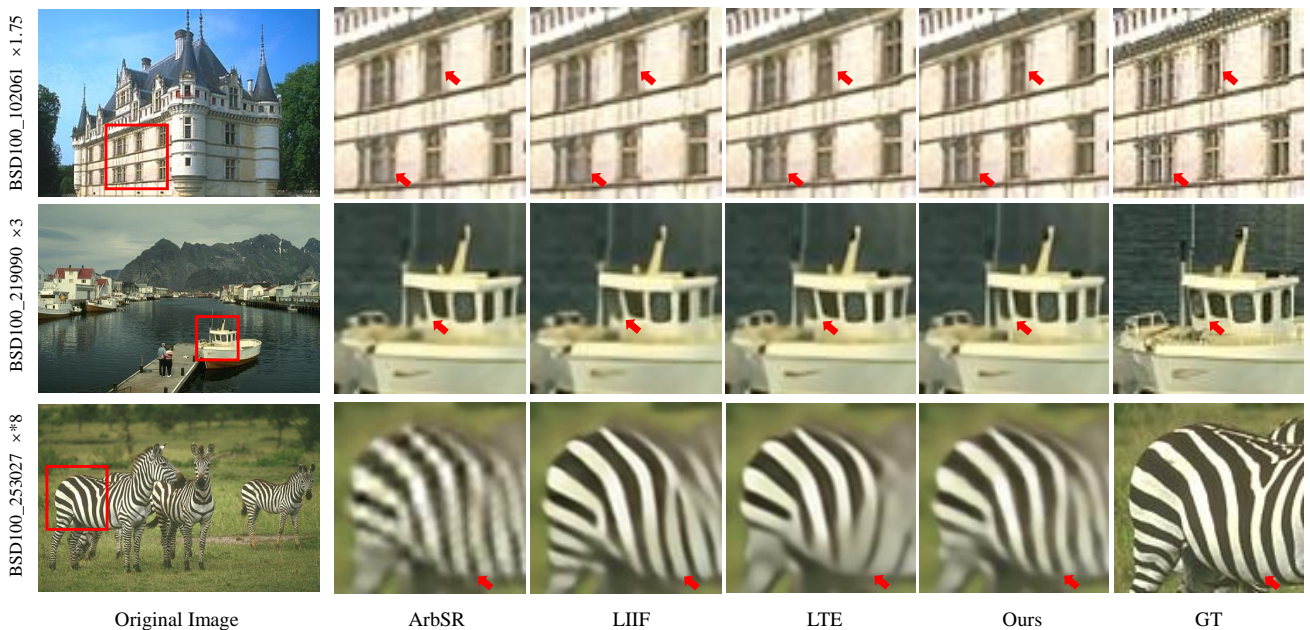

Figure 3. Visual comparison for arbitrary-scale SR models on BSD100 [9] dataset. The results show that our method also has significant advantages in reconstructing details when processing natural images (for example, the edge contour of the window in the first row and second row).

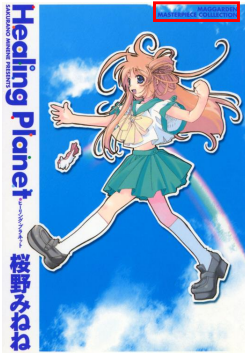

Manga109\_HealingPlanet ×3.25

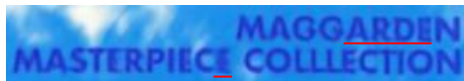

ArbSR

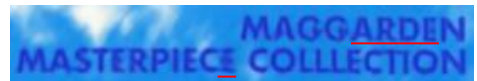

LTE

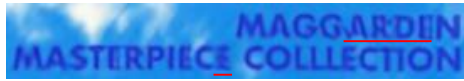

LIIF

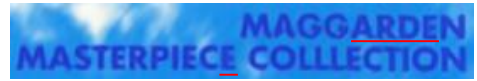

Ours

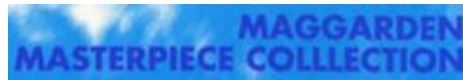

GT

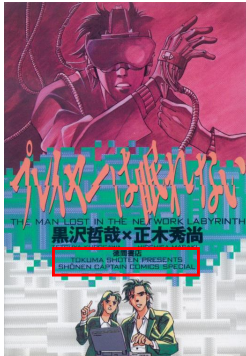

Manga109\_PrayerHaNemurenai ×4

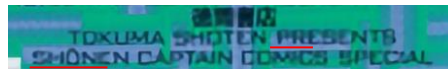

ArbSR

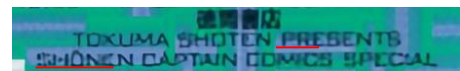

LTE

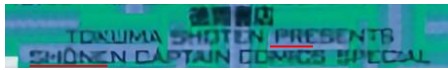

LIIF

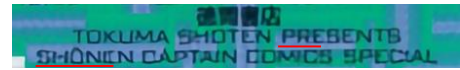

Ours

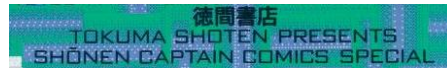

GT

Figure 4. Visual comparison for arbitrary-scale SR models on Manga109 [10] dataset. It can be observed that our model is able to restore more clear edges for printed texts at different scales, such as the letters E, A, P, R, and so on.
